# Supplementary material
Source: HighWire-hosted journal article supplement (https://jnm.snmjournals.org/highwire/filestream/115515/field_highwire_adjunct_files/0/265751_Supplemental_Data.pdf)
Supplement: 265751_Supplemental_Data.pdf [file 265751_Supplemental_Data.pdf]

## Supplemental Material

| Characteristic (n=18)                       | Median | (Range) | n  | (%)  |
|---------------------------------------------|--------|---------|----|------|
| <b>Gender</b>                               |        |         |    |      |
| Male                                        |        |         | 12 | (67) |
| Female                                      |        |         | 6  | (33) |
| <b>Age (years)</b>                          | 56     | (31-73) |    |      |
| <b>Tumor entity</b>                         |        |         |    |      |
| Colorectal                                  |        |         | 3  | (17) |
| Pancreas                                    |        |         | 3  | (17) |
| Prostate                                    |        |         | 3  | (17) |
| Bladder                                     |        |         | 2  | (11) |
| Lung                                        |        |         | 2  | (11) |
| Kidney                                      |        |         | 2  | (11) |
| Sarcoma                                     |        |         | 2  | (11) |
| Skin                                        |        |         | 1  | (6)  |
| <b>Suspicious lymph node region</b>         |        |         |    |      |
| pelvis                                      |        |         | 6  | (33) |
| abdomen                                     |        |         | 6  | (33) |
| mediastinum                                 |        |         | 3  | (17) |
| axilla                                      |        |         | 2  | (11) |
| inguinal                                    |        |         | 1  | (6)  |
| <b>Time between PETs (days)</b>             | 2      | (0-22)  |    |      |
| <b>Time between PET and Biopsy (days)</b>   | 24     | (1-164) |    |      |
| <b>Active tumor therapy at time of PET:</b> |        |         |    |      |
| None                                        |        |         | 14 | (78) |
| Chemo                                       |        |         | 4  | (22) |

**Supplemental Table 1: Patient Characteristics**

| Tumor characteristics      |            | N  | (%)  |
|----------------------------|------------|----|------|
| <b>Indication:</b>         |            |    |      |
| Staging                    |            | 9  | (50) |
| Restaging                  |            | 9  | (50) |
| <b>Extent:</b>             |            |    |      |
| No disease                 |            | 0  | (0)  |
| Locoregional disease only  |            | 11 | (61) |
| Distant metastatic disease |            | 7  | (39) |
| <b>Metastatic regions:</b> | lymph node | 4  | (22) |
|                            | bone       | 1  | (6)  |
|                            | visceral   | 5  | (28) |

**Supplemental Table 2: Tumor characteristics** (n=18 patients)

Tumor extent was tabulated based on combined findings from  $^{18}\text{F}$ -FDG PET and  $^{68}\text{Ga}$ -FAPI PET along with clinical information.

**Supplemental Table 3: Individual patient data for lymph node assessment (n=18 patients)**

| Patient No. | Tumor             |                     |                       | Lymph node     |                                   |                     |                       |                    |                     |                       |                       |                    |                     |
|-------------|-------------------|---------------------|-----------------------|----------------|-----------------------------------|---------------------|-----------------------|--------------------|---------------------|-----------------------|-----------------------|--------------------|---------------------|
|             | Entity            | SUV <sub>peak</sub> |                       | Region         | Histology                         | <sup>18</sup> F-FDG |                       |                    |                     | <sup>68</sup> Ga-FAPI |                       |                    |                     |
|             |                   | <sup>18</sup> F-FDG | <sup>68</sup> Ga-FAPI |                |                                   | Visual <sup>1</sup> | TBR <sub>muscle</sub> | SUV <sub>max</sub> | SUV <sub>peak</sub> | Visual <sup>2</sup>   | TBR <sub>muscle</sub> | SUV <sub>max</sub> | SUV <sub>peak</sub> |
| 1           | Bladder cancer    | 4.3                 | 4.4                   | pelvis         | benign                            | negative            | 1.4                   | 0.8                | 0.8                 | negative              | 0.4                   | 0.5                | 0.3                 |
| 2           | Prostate cancer   | 11.6                | 36.0                  | pelvis         | benign                            | negative            | 3.5                   | 1.6                | 1.4                 | negative              | 1.1                   | 0.9                | 0.6                 |
| 3           | Renal cancer      | 6.1                 | 3.2                   | renal          | benign                            | negative            | 4.1                   | 1.9                | 1.6                 | negative              | 0.6                   | 1.0                | 0.6                 |
| 4           | Lung cancer       | 3.9                 | 6.6                   | lung           | benign                            | negative            | 1.0                   | 0.7                | 0.5                 | negative              | 0.6                   | 0.7                | 0.7                 |
| 5           | Rectal cancer     | 35.0                | 11.7                  | mesentery      | benign                            | negative            | 2.8                   | 2.7                | 2.3                 | negative              | 0.4                   | 0.8                | 0.7                 |
| 6           | Sarcoma           | 19.4                | 8.6                   | inguinal       | benign                            | positive            | 12.1                  | 7.6                | 4.6                 | negative              | 0.7                   | 1.6                | 0.8                 |
| 7           | Prostate cancer   | 5.4                 | 12.2                  | pelvis         | benign                            | negative            | 3.2                   | 2.6                | 2.4                 | negative              | 0.7                   | 1.0                | 0.9                 |
| 8           | Prostate cancer   | 10.6                | 14.7                  | pelvis         | malignant                         | negative            | 3.0                   | 1.5                | 0.8                 | positive              | 1.6                   | 2.0                | 1.3                 |
| 9           | Pancreatic cancer | 4.4                 | 16.0                  | peripancreatic | benign                            | negative            | 3.3                   | 2.4                | 2.0                 | negative              | 1.2                   | 2.5                | 1.6                 |
| 10          | Bladder cancer    | 4.2                 | 4.3                   | pelvis         | benign                            | positive            | 8.2                   | 7.4                | 3.3                 | negative              | 1.3                   | 2.2                | 1.6                 |
| 11          | Pancreatic cancer | 1.8                 | 2.1                   | mesentery      | malignant                         | negative            | 3.5                   | 2.0                | 1.4                 | positive              | 2.3                   | 2.4                | 1.8                 |
| 12          | Rectal cancer     | 3.8                 | 6.4                   | axilla         | benign/ reactive <sup>3</sup>     | positive            | 23.6                  | 14.4               | 10.5                | negative              | 0.8                   | 2.7                | 1.8                 |
| 13          | Lung cancer       | 20.2                | 19.6                  | lung           | benign                            | positive            | 11.4                  | 5.4                | 3.1                 | negative              | 1.2                   | 3.0                | 2.1                 |
| 14          | Pancreatic cancer | 3.5                 | 3.3                   | peripancreatic | malignant                         | positive            | 5.5                   | 3.8                | 2.4                 | positive              | 2.4                   | 3.9                | 2.3                 |
| 15          | Melanoma          | 11.5                | 6.2                   | inguinal       | malignant                         | positive            | 12.3                  | 6.6                | 2.7                 | positive              | 3.1                   | 4.9                | 3.0                 |
| 16          | Sarcoma           | 12.9                | 9.1                   | mesentery      | benign/ inflammatory <sup>4</sup> | positive            | 29.2                  | 13.2               | 10.0                | positive              | 3.2                   | 4.6                | 3.5                 |
| 17          | Colon cancer      | 8.9                 | 5.3                   | lung           | malignant                         | positive            | 15.9                  | 9.1                | 6.9                 | positive              | 6.6                   | 5.1                | 4.2                 |
| 18          | Renal cancer      | 5.0                 | 3.2                   | pelvis         | malignant                         | positive            | 12.3                  | 6.7                | 4.4                 | positive              | 5.0                   | 12.4               | 7.5                 |

<sup>1</sup>Visuality was defined as: positive if SUV<sub>max</sub> > Percist and negative if SUV<sub>max</sub> < Percist.

<sup>2</sup>Visuality was defined as: positive if SUV<sub>max</sub> > (SUV<sub>mean</sub> of muscle (<sup>68</sup>Ga-FAPI) +2x SD) and negative if SUV<sub>max</sub> < (SUV<sub>mean</sub> of muscle (<sup>68</sup>Ga-FAPI) +2x SD).

<sup>3</sup>Reactive presenting as immune response to a vaccination 3 weeks before PET.

<sup>4</sup>Inflammatory presenting as sarcoid-like lymph nodes.

**Supplemental Table 4: Tumor detection efficacy** for  $^{18}\text{F}$ -FDG and  $^{68}\text{Ga}$ -FAPI PET/CT (n=18 patients). Tumor locations were assessed separately for  $^{18}\text{F}$ -FDG and  $^{68}\text{Ga}$ -FAPI and for 7 regions.

|                                  | overall detection | $^{18}\text{F}$ -FDG | $^{68}\text{Ga}$ -FAPI |
|----------------------------------|-------------------|----------------------|------------------------|
|                                  | N                 | N (%)                | N (%)                  |
| Patient level detection of tumor | 18                | 18 (100)             | 18 (100)               |
| Total N of lesions               | 89                | 85 (96)              | 85 (96)                |
| Primary                          | 18                | 18 (100)             | 18 (100)               |
| Local nodal                      | 40                | 39 (98)              | 40 (100)               |
| Distant nodal                    | 22                | 22 (100)             | 18 (82)                |
| Lung                             | 3                 | 3 (100)              | 3 (100)                |
| Liver                            | 4                 | 1 (25)               | 4 (100)                |
| Bone                             | 1                 | 1 (100)              | 1 (100)                |
| Other                            | 1                 | 1 (100)              | 1 (100)                |

A

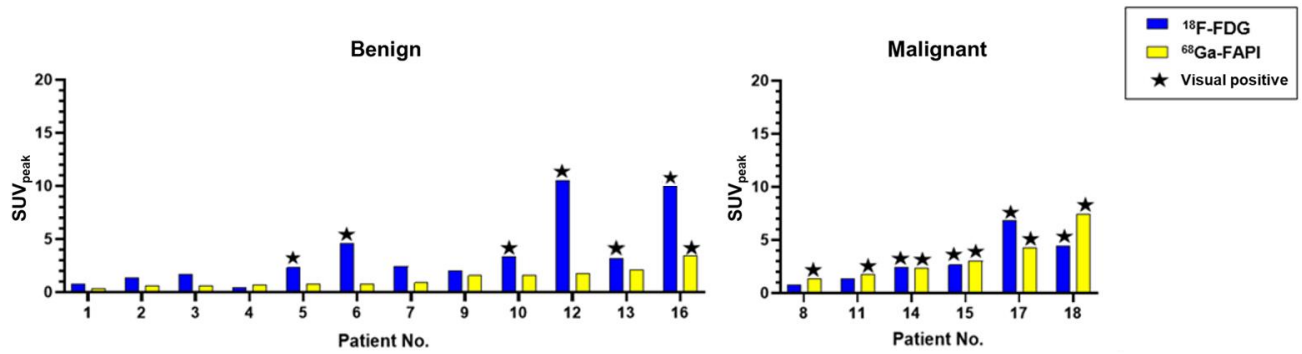

B

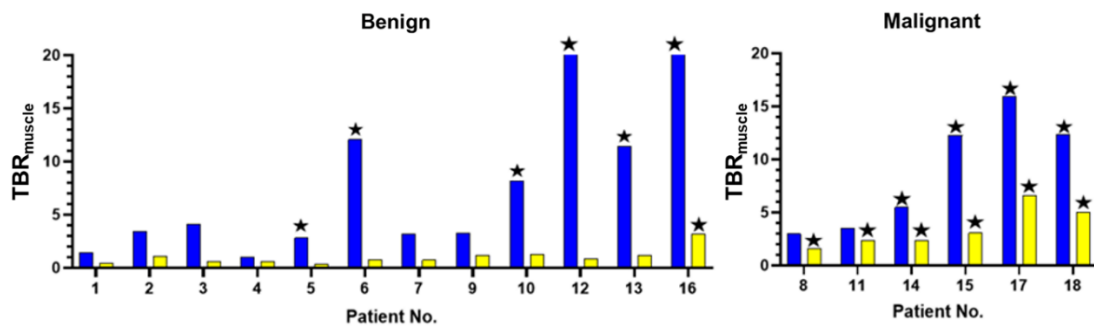

C

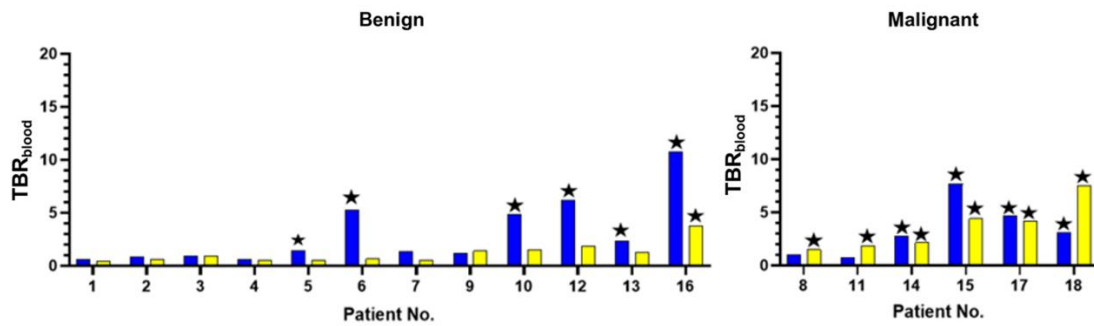

**Supplemental Figure 1: Individual lymph node assessment (n=18 patients, one lymph node per patient)**

Subparts are introduced as in (A) with the  $\text{SUV}_{\text{peak}}$ , in (B) with the  $\text{TBR}_{\text{muscle}}$  and in (C) with the  $\text{TBR}_{\text{blood}}$ .

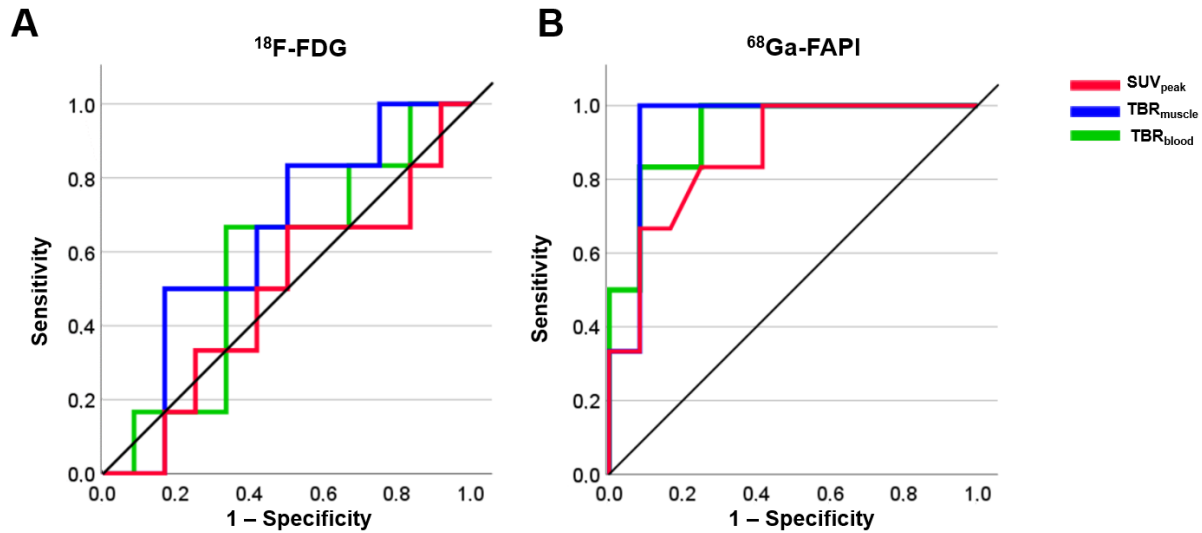

### Supplemental Figure 2: ROC-Analysis for $^{18}\text{F}$ -FDG and $^{68}\text{Ga}$ -FAPI

A: For  $^{18}\text{F}$ -FDG the Overall Model Quality was  $<0.5$  for  $\text{SUV}_{\text{peak}}$  (0.2),  $\text{TBR}_{\text{muscle}}$  (0.4) and  $\text{TBR}_{\text{blood}}$  (0.3) and therefore a cut-off not useful.

B: For  $^{68}\text{Ga}$ -FAPI the Overall Model Quality was  $>0.5$  for  $\text{SUV}_{\text{peak}}$  (0.7),  $\text{TBR}_{\text{muscle}}$  (0.8) and  $\text{TBR}_{\text{blood}}$  (0.8). The maximum Youden Index preserves a cut-off of 1.7 for  $\text{SUV}_{\text{peak}}$  (Youden Index: 0.6), 1.4 for  $\text{TBR}_{\text{muscle}}$  (Youden Index: 0.9), and 1.9 for  $\text{TBR}_{\text{blood}}$  (Youden Index: 0.8).

### Supplemental Figures 3-5. $^{18}\text{F}$ -FDG PET/CT and $^{68}\text{Ga}$ -FAPI PET/CT patient examples

The following images show examples of a true negative match, a false positive match as well as a true positive match.

$^{18}\text{F}$ -FDG (A-D) and  $^{68}\text{Ga}$ -FAPI (E-H) maximum intensity projections (MIP) (A, H), axial CT (B, E), PET (C, F), fused PET/CT (D, G) are shown. Arrows in CT images are pointing to the lymph nodes that were biopsied. If lymph nodes were rated positive, additional arrows are shown in the respective PET image.

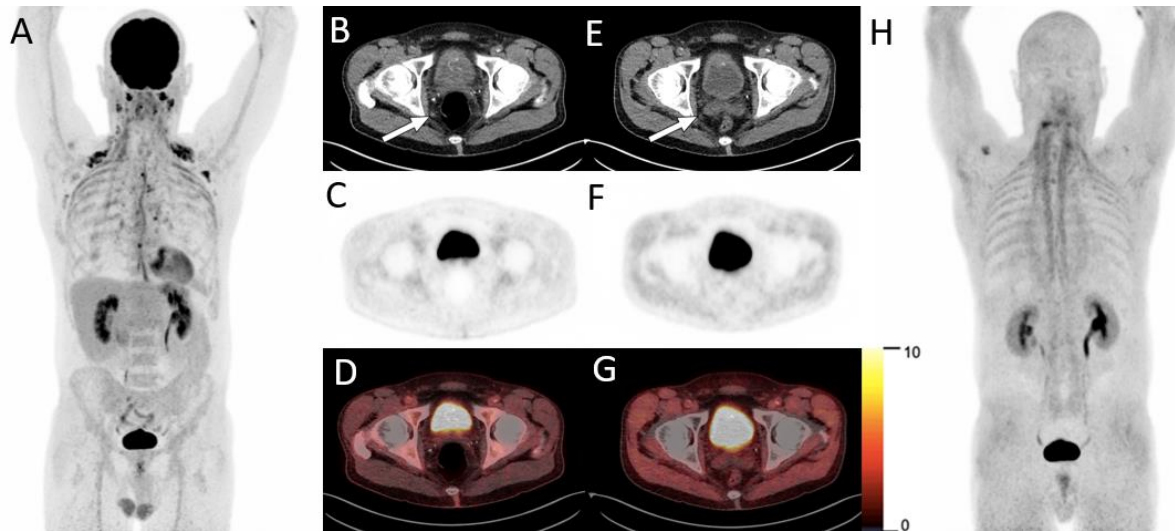

**Supplemental Figure 3: Patient 1, male, 59 years, bladder cancer, restaging during chemotherapy** showing a match of tracer-non-avid lymph nodes in  $^{18}\text{F}$ -FDG and  $^{68}\text{Ga}$ -FAPI PET. Histopathology result: benign.

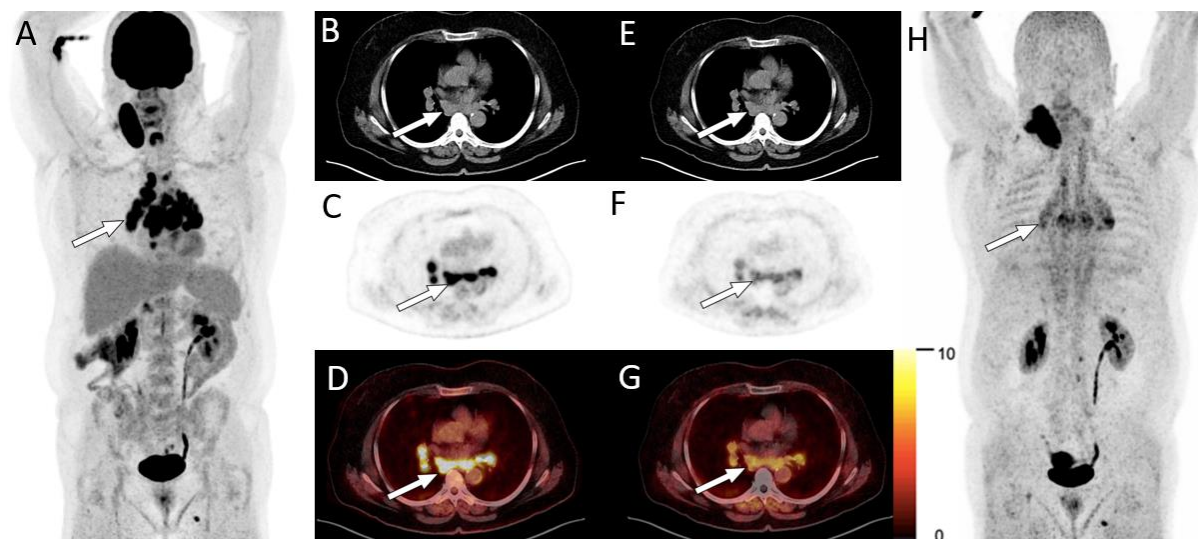

**Supplemental Figure 4: Patient 16, female, 61 years, small blue round cell tumor of the neck, staging before therapy** showing a match of tracer-avid lymph nodes in  $^{18}\text{F}$ -FDG and  $^{68}\text{Ga}$ -FAPI PET. Both tracers accumulate in a non-malignant lymph node affected by sarcoidosis but  $^{18}\text{F}$ -FDG revealed a 7-times higher  $\text{TBR}_{\text{muscle}}$  than  $^{68}\text{Ga}$ -FAPI. Histopathology result: benign/inflammatory.

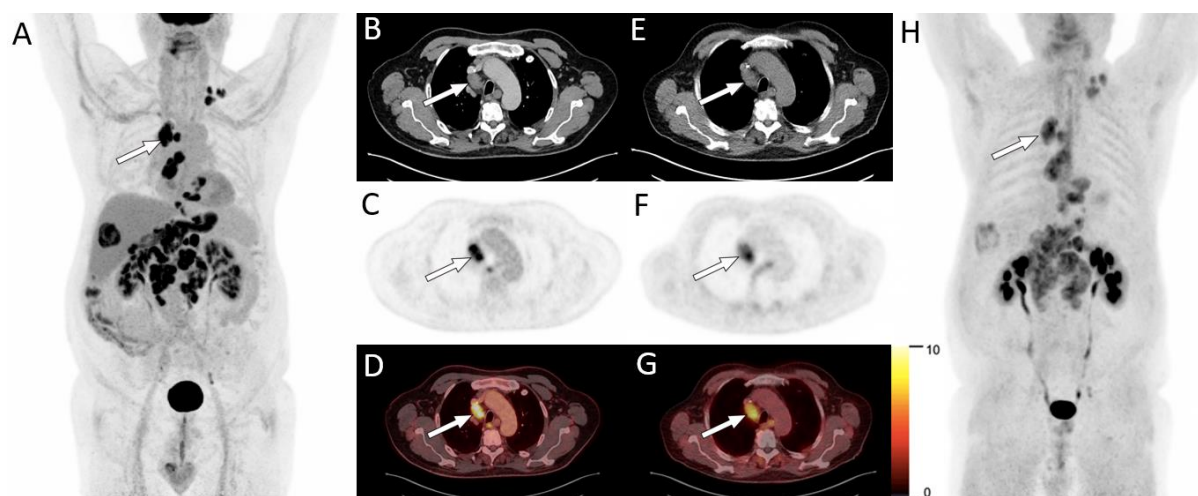

**Supplemental Figure 5: Patient 17, male, 68 years, colorectal adenocarcinoma, restaging during chemotherapy** showing a match of tracer-avid lymph nodes in  $^{18}\text{F}$ -FDG and  $^{68}\text{Ga}$ -FAPI PET. Histopathology result: malignant.
